# Supplementary material for: Problematic Social Media Use and Cyber Aggression in Italian Adolescents: The Remarkable Role of Social Support
Source: MDPI journal article supplement (doi:10.3390/ijerph19159763), 2022-08-08
Supplement: s1 [file s1]

# Supplementary material

**Table S1** - Prevalence of cyberbullying victimization (absolute and relative frequencies) by age categories, gender, and Region (HBSC 2018 - Italy).

| Cyberbullying victimization | 11y.o. Boys |            | 11y.o. Girls |              | 13y.o. Boys |             | 13y.o. Girls |              | 15y.o. Boys |             | 15y.o. Girls |             | All ages and genders |             |
|-----------------------------|-------------|------------|--------------|--------------|-------------|-------------|--------------|--------------|-------------|-------------|--------------|-------------|----------------------|-------------|
|                             | N           | %          | N            | %            | N           | %           | N            | %            | N           | %           | N            | %           | N                    | %           |
| Piedmont                    | 33          | 6.41       | 49           | 10.32        | 29          | 5.21        | 52           | 10.34        | 33          | 6.41        | 27           | 6.19        | 223                  | 7.43        |
| Aosta Valley                | 35          | 11.08      | 29           | 9.18         | 18          | 6.77        | 31           | 10.54        | 13          | 6.81        | 13           | 7.83        | 139                  | 8.97        |
| Lombardy                    | 54          | 9.75       | 66           | 12.41        | 26          | 4.32        | 60           | 10.64        | 32          | 6.31        | 43           | 6.85        | 281                  | 8.3         |
| Veneto                      | 85          | 8.44       | 99           | 9.78         | 72          | 7.06        | 113          | 11.04        | 49          | 5.75        | 62           | 7.98        | 480                  | 8.43        |
| Friuli Venezia Giulia       | 29          | 5.7        | 52           | 10.28        | 32          | 6           | 60           | 10.75        | 30          | 5.91        | 40           | 7.84        | 243                  | 7.78        |
| Liguria                     | 47          | 9.61       | 50           | 10.16        | 36          | 7.26        | 50           | 12.35        | 24          | 5.18        | 42           | 10.05       | 249                  | 9.01        |
| Emilia Romagna              | 53          | 10.08      | 69           | 13.61        | 38          | 7.41        | 55           | 10.04        | 21          | 4.77        | 53           | 9.09        | 289                  | 9.27        |
| Tuscany                     | 41          | 8.25       | 60           | 11.61        | 27          | 5.08        | 60           | 11.21        | 34          | 6.67        | 34           | 7.33        | 256                  | 8.38        |
| Umbria                      | 17          | 8.9        | 24           | 13.33        | 17          | 8.06        | 30           | 15.15        | 9           | 4.11        | 25           | 9.09        | 122                  | 9.58        |
| Marche                      | 42          | 7.87       | 52           | 10.81        | 35          | 6.36        | 44           | 8.82         | 29          | 6.14        | 50           | 9.16        | 252                  | 8.18        |
| Latium                      | 41          | 8.06       | 51           | 10.39        | 25          | 5.2         | 50           | 10.18        | 27          | 5.01        | 36           | 8.39        | 230                  | 7.82        |
| Abruzzo                     | 37          | 7.87       | 60           | 13.22        | 35          | 7.45        | 50           | 12.08        | 28          | 5.98        | 45           | 8.41        | 255                  | 9.07        |
| Molise                      | 33          | 8.46       | 48           | 12.63        | 37          | 7.43        | 47           | 11.22        | 24          | 6.32        | 32           | 8.31        | 221                  | 9.01        |
| Campania                    | 35          | 7.32       | 41           | 10.1         | 39          | 8.11        | 53           | 11.21        | 33          | 7.07        | 41           | 8.7         | 242                  | 8.72        |
| Apulia                      | 49          | 10.38      | 57           | 11.95        | 44          | 8.07        | 54           | 10.74        | 30          | 5.86        | 33           | 6.09        | 267                  | 8.75        |
| Basilicata                  | 24          | 8.3        | 26           | 10.2         | 12          | 4.14        | 39           | 11.96        | 13          | 4.73        | 13           | 6.4         | 127                  | 7.75        |
| Calabria                    | 49          | 9.82       | 44           | 10.02        | 45          | 8.41        | 60           | 11.32        | 34          | 7.11        | 32           | 6.12        | 264                  | 8.79        |
| Sicily                      | 46          | 10.24      | 43           | 10.12        | 38          | 7.68        | 56           | 11.59        | 36          | 6.57        | 46           | 10.09       | 265                  | 9.28        |
| Sardinia                    | 24          | 9.38       | 32           | 11.47        | 23          | 6.63        | 27           | 8.82         | 13          | 7.6         | 10           | 5.52        | 129                  | 8.38        |
| Bolzano                     | 25          | 6.79       | 28           | 7.37         | 25          | 6.2         | 35           | 8.31         | 15          | 4.79        | 21           | 5.71        | 149                  | 6.61        |
| Trento                      | 43          | 9.03       | 22           | 4.77         | 38          | 7.16        | 52           | 10.12        | 18          | 3.71        | 41           | 7.74        | 214                  | 7.14        |
| <b>Total</b>                | <b>842</b>  | <b>8.6</b> | <b>1002</b>  | <b>10.59</b> | <b>691</b>  | <b>6.67</b> | <b>1078</b>  | <b>10.77</b> | <b>545</b>  | <b>5.85</b> | <b>739</b>   | <b>7.84</b> | <b>4897</b>          | <b>8.39</b> |

**Table S2** - Prevalence of cyberbullying perpetration (absolute and relative frequencies) by age categories, gender, and Region (HBSC 2018 - Italy).

| Cyberbullying<br>perpetration | 11y.o. Boys |             | 11y.o. Girls |             | 13y.o. Boys |             | 13y.o. Girls |             | 15y.o. Boys |             | 15y.o. Girls |             | All ages and genders |             |
|-------------------------------|-------------|-------------|--------------|-------------|-------------|-------------|--------------|-------------|-------------|-------------|--------------|-------------|----------------------|-------------|
|                               | N           | %           | N            | %           | N           | %           | N            | %           | N           | %           | N            | %           | N                    | %           |
| Piedmont                      | 33          | 6.43        | 27           | 5.70        | 31          | 5.60        | 40           | 7.95        | 41          | 7.95        | 21           | 4.83        | 193                  | 6.44        |
| Aosta Valley                  | 22          | 7.01        | 13           | 4.13        | 18          | 6.77        | 19           | 6.46        | 10          | 5.18        | 9            | 5.42        | 91                   | 5.88        |
| Lombardy                      | 40          | 7.23        | 38           | 7.16        | 37          | 6.13        | 39           | 6.88        | 53          | 10.5        | 29           | 4.63        | 236                  | 6.97        |
| Veneto                        | 71          | 7.08        | 64           | 6.33        | 76          | 7.47        | 76           | 7.43        | 89          | 10.48       | 52           | 6.66        | 428                  | 7.53        |
| Friuli Venezia Giulia         | 19          | 3.73        | 27           | 5.35        | 30          | 5.63        | 40           | 7.14        | 42          | 8.33        | 20           | 3.91        | 178                  | 5.70        |
| Liguria                       | 31          | 6.35        | 37           | 7.52        | 37          | 7.49        | 31           | 7.62        | 28          | 6.06        | 33           | 7.89        | 197                  | 7.14        |
| Emilia Romagna                | 27          | 5.14        | 27           | 5.33        | 38          | 7.41        | 38           | 6.91        | 25          | 5.69        | 41           | 7.06        | 196                  | 6.29        |
| Tuscany                       | 33          | 6.64        | 30           | 5.80        | 40          | 7.48        | 37           | 6.93        | 45          | 8.81        | 36           | 7.74        | 221                  | 7.22        |
| Umbria                        | 10          | 5.24        | 9            | 5.00        | 11          | 5.19        | 14           | 7.07        | 17          | 7.73        | 32           | 11.64       | 93                   | 7.29        |
| Marche                        | 35          | 6.54        | 26           | 5.42        | 43          | 7.82        | 35           | 7.04        | 38          | 8.07        | 34           | 6.24        | 211                  | 6.86        |
| Latium                        | 31          | 6.08        | 32           | 6.50        | 25          | 5.19        | 29           | 5.92        | 58          | 10.76       | 41           | 9.53        | 216                  | 7.34        |
| Abruzzo                       | 37          | 7.81        | 33           | 7.30        | 35          | 7.38        | 26           | 6.28        | 37          | 7.91        | 36           | 6.72        | 204                  | 7.24        |
| Molise                        | 24          | 6.19        | 21           | 5.50        | 42          | 8.42        | 31           | 7.40        | 29          | 7.61        | 24           | 6.23        | 171                  | 6.97        |
| Campania                      | 31          | 6.49        | 15           | 3.69        | 38          | 7.92        | 48           | 10.19       | 37          | 7.91        | 31           | 6.60        | 200                  | 7.21        |
| Apulia                        | 38          | 8.07        | 33           | 6.89        | 44          | 8.04        | 44           | 8.75        | 38          | 7.42        | 39           | 7.21        | 236                  | 7.73        |
| Basilicata                    | 19          | 6.53        | 13           | 5.14        | 16          | 5.48        | 30           | 9.26        | 22          | 7.97        | 7            | 3.45        | 107                  | 6.53        |
| Calabria                      | 40          | 8.05        | 21           | 4.81        | 40          | 7.49        | 43           | 8.11        | 46          | 9.68        | 41           | 7.81        | 231                  | 7.71        |
| Sicily                        | 32          | 7.13        | 18           | 4.22        | 34          | 6.84        | 32           | 6.64        | 60          | 10.95       | 34           | 7.39        | 210                  | 7.33        |
| Sardinia                      | 23          | 9.02        | 21           | 7.53        | 29          | 8.38        | 23           | 7.52        | 16          | 9.36        | 11           | 6.08        | 123                  | 8.00        |
| Bolzano                       | 18          | 4.88        | 12           | 3.15        | 29          | 7.20        | 31           | 7.31        | 17          | 5.45        | 11           | 2.98        | 118                  | 5.23        |
| Trento                        | 39          | 8.28        | 21           | 4.58        | 46          | 8.70        | 37           | 7.21        | 26          | 5.37        | 37           | 6.98        | 206                  | 6.90        |
| <b>Total</b>                  | <b>653</b>  | <b>6.68</b> | <b>538</b>   | <b>5.69</b> | <b>739</b>  | <b>7.13</b> | <b>743</b>   | <b>7.42</b> | <b>774</b>  | <b>8.32</b> | <b>619</b>   | <b>6.56</b> | <b>4066</b>          | <b>6.97</b> |

**Table S3** - Prevalence of Problematic Social Media Use (PSMU), absolute and relative frequencies by age categories, gender, and Region (HBSC 2018 - Italy).

| Cyberbullying<br>perpetration | 11y.o. Boys |             | 11y.o. Girls |             | 13y.o. Boys |             | 13y.o. Girls |              | 15y.o. Boys |             | 15y.o. Girls |              | All ages and genders |             |
|-------------------------------|-------------|-------------|--------------|-------------|-------------|-------------|--------------|--------------|-------------|-------------|--------------|--------------|----------------------|-------------|
|                               | N           | %           | N            | %           | N           | %           | N            | %            | N           | %           | N            | %            | N                    | %           |
| Piedmont                      | 36          | 7.76        | 36           | 8.09        | 34          | 6.37        | 65           | 13.18        | 20          | 3.98        | 39           | 9.11         | 230                  | 8.02        |
| Aosta Valley                  | 13          | 4.55        | 15           | 5.08        | 15          | 5.86        | 31           | 10.76        | 9           | 4.89        | 14           | 8.70         | 97                   | 6.6         |
| Lombardy                      | 50          | 9.94        | 49           | 10.04       | 48          | 8.39        | 83           | 14.82        | 34          | 6.94        | 62           | 10.16        | 326                  | 10.11       |
| Veneto                        | 71          | 8.53        | 70           | 7.78        | 78          | 8.26        | 119          | 12.03        | 51          | 6.30        | 80           | 10.51        | 469                  | 8.96        |
| Friuli Venezia Giulia         | 34          | 7.82        | 25           | 5.56        | 20          | 3.94        | 52           | 9.61         | 23          | 4.73        | 41           | 8.17         | 195                  | 6.68        |
| Liguria                       | 33          | 7.37        | 36           | 7.71        | 43          | 8.96        | 48           | 12.03        | 27          | 6.07        | 43           | 10.67        | 230                  | 8.71        |
| Emilia Romagna                | 26          | 5.44        | 34           | 7.16        | 41          | 8.17        | 57           | 10.59        | 26          | 6.15        | 65           | 11.42        | 249                  | 8.34        |
| Tuscany                       | 25          | 5.43        | 35           | 7.22        | 23          | 4.41        | 63           | 11.98        | 24          | 4.88        | 44           | 9.67         | 214                  | 7.28        |
| Umbria                        | 12          | 6.86        | 10           | 5.71        | 19          | 9.22        | 27           | 13.78        | 16          | 7.51        | 20           | 7.52         | 104                  | 8.45        |
| Marche                        | 46          | 9.33        | 50           | 11.21       | 24          | 4.49        | 61           | 12.58        | 22          | 4.78        | 47           | 8.74         | 250                  | 8.46        |
| Latium                        | 34          | 7.00        | 35           | 7.49        | 28          | 6.14        | 56           | 11.69        | 23          | 4.42        | 53           | 12.86        | 229                  | 8.12        |
| Abruzzo                       | 42          | 9.46        | 37           | 8.56        | 31          | 6.71        | 62           | 15.27        | 21          | 4.58        | 56           | 10.65        | 249                  | 9.12        |
| Molise                        | 35          | 9.36        | 39           | 10.46       | 35          | 7.1         | 57           | 13.73        | 27          | 7.44        | 34           | 9.16         | 227                  | 9.5         |
| Campania                      | 49          | 10.72       | 51           | 13.49       | 42          | 8.96        | 73           | 15.73        | 23          | 5.08        | 48           | 10.43        | 286                  | 10.67       |
| Apulia                        | 37          | 8.22        | 45           | 9.98        | 42          | 8.11        | 79           | 16.42        | 40          | 8.02        | 76           | 14.18        | 319                  | 10.87       |
| Basilicata                    | 19          | 6.96        | 24           | 10.26       | 22          | 7.83        | 40           | 12.31        | 17          | 6.59        | 16           | 8.00         | 138                  | 8.78        |
| Calabria                      | 42          | 8.96        | 42           | 10.07       | 37          | 7.13        | 71           | 13.71        | 33          | 7.28        | 60           | 11.88        | 285                  | 9.89        |
| Sicily                        | 41          | 10.00       | 40           | 9.85        | 50          | 10.37       | 67           | 14.14        | 23          | 4.38        | 52           | 11.71        | 273                  | 9.96        |
| Sardinia                      | 20          | 8.40        | 26           | 9.89        | 21          | 6.29        | 36           | 12.24        | 9           | 5.73        | 19           | 10.73        | 131                  | 8.95        |
| Bolzano                       | 28          | 8.86        | 27           | 7.83        | 24          | 6.49        | 49           | 12.22        | 31          | 10.16       | 32           | 8.94         | 191                  | 9.12        |
| Trento                        | 43          | 10.34       | 33           | 7.73        | 44          | 8.78        | 46           | 9.22         | 27          | 5.72        | 37           | 7.06         | 230                  | 8.1         |
| <b>Total</b>                  | <b>736</b>  | <b>8.26</b> | <b>759</b>   | <b>8.61</b> | <b>721</b>  | <b>7.25</b> | <b>1242</b>  | <b>12.71</b> | <b>526</b>  | <b>5.86</b> | <b>938</b>   | <b>10.19</b> | <b>4922</b>          | <b>8.85</b> |
